# Supplementary material
Source: PubMed Central journal article supplement (PMC4135632)
Supplement: JB.01670-14_zjb999093261so1.pdf [file JB.01670-14_zjb999093261so1.pdf]

**Supporting Material**  
**Wang, Haitjema and Fuqua**

| <b>TABLE S1.</b> Strains and plasmids used in this study |                                                                   |                     |
|----------------------------------------------------------|-------------------------------------------------------------------|---------------------|
| Strain or Plasmid                                        | Relevant Feature(s)                                               | Source or Reference |
| Strains                                                  |                                                                   |                     |
| <i>Escherichia coli</i>                                  |                                                                   |                     |
| DH5 $\alpha$ / $\lambda$ <i>pir</i>                      | $\lambda$ <i>pir</i> , cloning strain                             | (1)                 |
| Top10F'                                                  | Cloning strain                                                    | Invitrogen          |
| S17-1/ $\lambda$ <i>pir</i>                              | $\lambda$ <i>pir</i> , Tra <sup>+</sup> , cloning strain          | (2)                 |
| S17-1/ $\lambda$ <i>pir</i> (pFD1)                       | <i>Himar1</i> conjugal donor                                      | (3)                 |
| <i>A. tumefaciens</i>                                    |                                                                   |                     |
| C58                                                      | Nopaline type strain; pTiC58; pAtC58                              | (4)                 |
| $\Delta$ <i>ctpA</i>                                     | $\Delta$ Atu0224 C58 derivative                                   | This study          |
| $\Delta$ <i>ctpB</i>                                     | $\Delta$ Atu0223 C58 derivative                                   | This study          |
| $\Delta$ <i>ctpCD</i>                                    | $\Delta$ Atu0222 $\Delta$ Atu0221 C58 derivative                  | This study          |
| $\Delta$ <i>ctpE</i>                                     | $\Delta$ Atu0220 C58 derivative                                   | This study          |
| $\Delta$ <i>ctpF</i>                                     | $\Delta$ Atu0219 C58 derivative                                   | This study          |
| $\Delta$ <i>ctpG</i>                                     | $\Delta$ Atu0218 C58 derivative                                   | This study          |
| $\Delta$ <i>ctpH</i>                                     | $\Delta$ Atu0217 C58 derivative                                   | This study          |
| $\Delta$ <i>ctpl</i>                                     | $\Delta$ Atu0216 C58 derivative                                   | This study          |
| $\Delta$ <i>pilA</i>                                     | $\Delta$ Atu3514 C58 derivative                                   | This study          |
| $\Delta$ <i>pilA<math>\Delta</math><i>ctpA</i></i>       | $\Delta$ Atu0224 $\Delta$ Atu3514 C58 derivative                  | This study          |
| $\Delta$ <i>ctpCD<math>\Delta</math><i>ctpA</i></i>      | $\Delta$ Atu0224 $\Delta$ Atu0222 $\Delta$ Atu0221 C58 derivative | This study          |

|                           |                                                                               |              |
|---------------------------|-------------------------------------------------------------------------------|--------------|
| $\Delta ctpE\Delta ctpA$  | $\Delta Atu0224\Delta Atu0220$ C58 derivative                                 | This study   |
| $\Delta ctpF\Delta ctpA$  | $\Delta Atu0224\Delta Atu0219$ C58 derivative                                 | This study   |
| $\Delta ctpH\Delta ctpA$  | $\Delta Atu0224\Delta Atu0217$ C58 derivative                                 | This study   |
| $\Delta ctpI\Delta ctpA$  | $\Delta Atu0224\Delta Atu0216$ C58 derivative                                 | This study   |
| $\Delta uppC$             | $\Delta Atu1238$ C58 derivative                                               | From the lab |
| $\Delta ctpCD\Delta uppC$ | $\Delta Atu1238\Delta Atu0222\Delta Atu0221$ C58 derivative                   | This study   |
| $\Delta ctpE\Delta uppC$  | $\Delta Atu1238\Delta Atu0220$ C58 derivative                                 | This study   |
| $\Delta ctpF\Delta uppC$  | $\Delta Atu1238\Delta Atu0219$ C58 derivative                                 | This study   |
| $\Delta ctpH\Delta uppC$  | $\Delta Atu1238\Delta Atu0217$ C58 derivative                                 | This study   |
| $\Delta ctpI\Delta uppC$  | $\Delta Atu1238\Delta Atu0216$ C58 derivative                                 | This study   |
| C58p-                     | Ti and At plasmid cured C58 derivative                                        | From the lab |
| C58p- $\Delta ctpCD$      | $\Delta Atu0222\Delta Atu0221$ C58p-derivative                                | This study   |
| C58p- $\Delta ctpE$       | $\Delta Atu0220$ C58p- derivative                                             | This study   |
| C58p- $\Delta ctpF$       | $\Delta Atu0219$ C58p- derivative                                             | This study   |
| C58p- $\Delta ctpH$       | $\Delta Atu0217$ C58p- derivative                                             | This study   |
| C58p- $\Delta ctpI$       | $\Delta Atu0216$ C58p- derivative                                             | This study   |
| Plasmids                  |                                                                               |              |
| pGEM-T easy               | PCR cloning vector; amp <sup>R</sup>                                          | Promega      |
| pJZ383                    | $P_{lac}$ - <i>gfpmut3</i> , Sp <sup>R</sup> , pVS replicon                   | J. Zhu, (5)  |
| pNPTS138                  | colE1 suicide plasmid; <i>sacB</i> (Suc <sup>S</sup> ); Kan <sup>R</sup>      | (6)          |
| pSRKKm                    | Broad host range $P_{lac}$ expression vector; <i>lacIQ</i> ; Kan <sup>R</sup> | (7)          |
| pSRKGm                    | Broad host range $P_{lac}$ expression vector; <i>lacIQ</i> ; Gen <sup>R</sup> | (7)          |

|           |                                                                                                 |            |
|-----------|-------------------------------------------------------------------------------------------------|------------|
| pRA301    | Broad host range; promoterless <i>lacZ</i> ; Spc <sup>R</sup>                                   | (8)        |
| pCTPA101  | pNPTS138 carrying Atu0224 SOE deletion fragment                                                 | This study |
| pCTPB101  | pNPTS138 carrying Atu0223 SOE deletion fragment                                                 | This study |
| pCTPCD101 | pNPTS138 carrying Atu0222 and Atu0221 SOE deletion fragment                                     | This study |
| pCTPE101  | pNPTS138 carrying Atu0220 SOE deletion fragment                                                 | This study |
| pCTPF101  | pNPTS138 carrying Atu0219 SOE deletion fragment                                                 | This study |
| pCTPG101  | pNPTS138 carrying Atu0218 SOE deletion fragment                                                 | This study |
| pCTPH101  | pNPTS138 carrying Atu0217 SOE deletion fragment                                                 | This study |
| pCTPI101  | pNPTS138 carrying Atu0216 SOE deletion fragment                                                 | This study |
| pPilA101  | pNPTS138 carrying Atu3514 SOE deletion fragment                                                 | This study |
| pCTPA201  | pSRKKm <i>P<sub>lac</sub>::Atu0224</i>                                                          | This study |
| pCTPB201  | pSRKKm <i>P<sub>lac</sub>::Atu0223</i>                                                          | This study |
| pCTPE201  | pSRKGm <i>P<sub>lac</sub>::Atu0220</i>                                                          | This study |
| pCTPG201  | pSRKKm <i>P<sub>lac</sub>::Atu0218</i>                                                          | This study |
| pPilA201  | pSRKKm <i>P<sub>lac</sub>::Atu3514</i>                                                          | This study |
| pCTPA301  | <i>ctpA</i> promoter fragment in-frame fused to <i>lacZ</i> in pRA301                           | This study |
| pCTPB301  | Intergenic fragment between <i>ctpA</i> and <i>ctpB</i> in-frame fused to <i>lacZ</i> in pRA301 | This study |

|          |                                                                                                 |            |
|----------|-------------------------------------------------------------------------------------------------|------------|
| pCTPC301 | Intergenic fragment between <i>ctpB</i> and <i>ctpC</i> in-frame fused to <i>lacZ</i> in pRA301 | This study |
| pCTPE301 | Intergenic fragment between <i>ctpD</i> and <i>ctpE</i> in-frame fused to <i>lacZ</i> in pRA301 | This study |
| pPilA301 | <i>pilA</i> promoter fragment in-frame fused to <i>lacZ</i> in pRA301                           | This study |

**Table S2. Primer Sequences**

| Primer | Restriction Site <sup>a</sup> | Sequence <sup>b</sup>                    |
|--------|-------------------------------|------------------------------------------|
| ctpA1  | <i>SpeI</i>                   | actagtATGATTTCTGTGACCGA                  |
| ctpA2  | NE                            | aagcttggtaccgaattcTGATCATTGAAAAGCATCGTGC |
| ctpA3  | NE                            | gaattcggtagcaagcttCATGAGGTCTCTCCTAAATCTT |
| ctpA4  | <i>SphI</i>                   | gcatgcCGGATGATCGTCACGTGT                 |
| ctpB1  | <i>SpeI</i>                   | actagtGTTATGAAACTGTCGACCAC               |
| ctpB2  | NE                            | aagcttggtaccgaattcGCCAGTATTTTATAATTCCG   |
| ctpB3  | NE                            | gaattcggtagcaagcttCATAAATAGCCTACCTTCGT   |
| ctpB4  | <i>SphI</i>                   | gcatgcAACTCATCCTTCCGTTTACT               |
| ctpC1  | <i>SpeI</i>                   | actagtCATCTGAATGTTGACGATAC               |
| ctpC2  | NE                            | aagcttggtaccgaattcGGGTTCATCTACAAATGACG   |
| ctpD3  | NE                            | gaattcggtagcaagcttAACGGAAAGAATGACGATAC   |
| ctpD4  | <i>SphI</i>                   | gcatgcGTCTTTCGCTTTTATCGCTC               |
| ctpE1  | <i>SpeI</i>                   | actagtGATAAAGCGTGATGTCGTTG               |
| ctpE2  | NE                            | aagcttggtaccgaattcTGATGCAGGTCCACCATTTC   |
| ctpE3  | NE                            | gaattcggtagcaagcttTCCGACAAGGTGATAGGGT    |
| ctpE4  | <i>SphI</i>                   | gcatgcGCAACGAAACGGAACCTTGTC              |
| ctpF1  | <i>SpeI</i>                   | actagt GGCGAAATTTTGTGATCGTGA             |
| ctpF2  | NE                            | aagcttggtaccgaattcCTGAAGAATATTCTCAAGCG   |
| ctpF3  | NE                            | gaattcggtagcaagcttGTATTCTACAGCGCTCATCG   |
| ctpF4  | <i>SphI</i>                   | gcatgcGTCAACATTGAGATGCCTTC               |
| ctpG1  | <i>SpeI</i>                   | actagtGGTCAACAAGGACAGACCAT               |

|       |                |                                          |
|-------|----------------|------------------------------------------|
| ctpG2 | NE             | aagcttggtagcgaattcAAGTCATCCTAAGGAAAGCG   |
| ctpG3 | NE             | gaattcggtagcgaattcCATCGGCTTTTCCGTCTAAG   |
| ctpG4 | <i>SphI</i>    | gcatgcGTTGCTGTTCTCGATCTTCC               |
| ctpH1 | <i>SpeI</i>    | actagtCGATATAGCCGAAAACAAGC               |
| ctpH2 | NE             | aagcttggtagcgaattcGATATTTGAGAGGCGACGAT   |
| ctpH3 | NE             | gaattcggtagcgaattcTAACACTATTGTCTGGGTCCA  |
| ctpH4 | <i>SphI</i>    | gcatgcTCAAGAACTGCCTTCGTATG               |
| ctpl1 | <i>SpeI</i>    | actagtTGACCTCAAGCCGAATGATC               |
| ctpl2 | NE             | aagcttggtagcgaattcTTCTGACGTTTACGCACAGC   |
| ctpl3 | NE             | gaattcggtagcgaattcCATCGTCGCCTCTCAAATAT   |
| ctpl4 | <i>SphI</i>    | gcatgcGGTATTGGCATTCTCCTCA                |
| pilA1 | <i>SpeI</i>    | actagtAAGCCCGATGGTCTGTTTCT               |
| pilA2 | NE             | aagcttggtagcgaattcTTTCCAAGGGTTGAAAGCT    |
| pilA3 | NE             | gaattcggtagcgaattcCACACGCCCTGTTGAAATTC   |
| pilA4 | <i>SphI</i>    | gcatgcACGAGGATTTCTGGAAGACG               |
| ctpA7 | <i>NdeI</i>    | GCA <u>Tcat</u> ATGACCAAGATTTTCGCTCG     |
| ctpA8 | <i>HindIII</i> | GCA <u>Taagctt</u> CTTTTCAATGATCAGACGCC  |
| ctpB5 | <i>NdeI</i>    | GACT <u>cat</u> ATGATTGTCGCGGCAATT       |
| ctpB6 | <i>HindIII</i> | GACT <u>aagctt</u> TTATAAAATACTGGCGAT    |
| ctpE5 | <i>NdeI</i>    | GACT <u>catatg</u> ACCACCAACGCCATTCC     |
| ctpE6 | <i>HindIII</i> | AGT <u>Caagctt</u> CATCAGTTTGTCTGGTGCCGT |
| ctpG5 | <i>NdeI</i>    | GACT <u>cat</u> ATGTTCTGGAAAACGCGGG      |
| ctpG6 | <i>HindIII</i> | ACT <u>aagctt</u> TTAGGATGACTTTTCCATCT   |
| PilA5 | <i>NdeI</i>    | GACT <u>cat</u> ATGCCGGTTGTCTGAAACGCA    |

|        |                |                                |
|--------|----------------|--------------------------------|
| PilA6  | <i>HindIII</i> | GACTaagcttTCAACCCTTGGGAAAAGCGT |
| CtpAP1 | <i>EcoRI</i>   | gaattcATGATTTTCGCCAGTTTTCCG    |
| CtpAP2 | <i>PstI</i>    | ctgcagCATGAGGTCTCTCCTAAATCT    |
| CtpBP1 | <i>EcoRI</i>   | gaattcGATCATTGAAAAGCATCGTGC    |
| CtpBP2 | <i>PstI</i>    | ctgcagCATAAATAGCCTACCTTCGTT    |
| CtpCP1 | <i>BamHI</i>   | ggatccAAGCTCCTCTCGTCAAAGCAG    |
| CtpCP2 | <i>HindIII</i> | aagcttCATGCTCGATCCTTGAGGGAA    |
| CtpEP1 | <i>BamHI</i>   | ggatccGGATCAGTGGGGTTCATC       |
| CtpEP2 | <i>HindIII</i> | aagcttGTTGGTGGTCATTGGGTC       |
| PilAP1 | <i>BamHI</i>   | ggatccTGATCATTTACCATCAACGG     |
| PilAP2 | <i>HindIII</i> | aagcttCACACGCCCTGTTGAAATTC     |

Upper case sequence anneals to target sequences; lower case residues are engineered into oligonucleotides but do not anneal with target sequences

### Supporting Information References

1. **Chiang SL, and Rubin EJ.** 2002. Construction of a mariner-based transposon for epitope-tagging and genomic targeting. *Gene* **296**:179-185.
2. **Kalogeraki VS, Winans SC.** 1997. Suicide plasmids containing promoterless reporter genes can simultaneously disrupt and create fusions to target genes of diverse bacteria. *Gene* **188**:69-75.
3. **Lampe DJ, Akerley BJ, Rubin EJ, Mekalanos JJ, Robertson HM.** 1999. Hyperactive transposase mutants of the Himar1 mariner transposon. *Proceedings of the National Academy of Sciences, USA* **96**:11428-11433.

4. **Watson B, Currier TC, Gordon MP, Chilton MD, and Nester EW.** 1975. Plasmid Required for Virulence of *Agrobacterium tumefaciens*. *J. Bacteriol.* **123**:255-264.
5. **Cormack BP, Valdivia RH, and Falkow S.** 1996. FACS-optimized mutants of the green fluorescent protein (GFP). *Gene* **173**:33-38.
6. **Hibbing ME, Fuqua C.** 2011. Antiparallel and interlinked control of cellular iron levels by the Irr and RirA regulators of *Agrobacterium tumefaciens*. *J. Bacteriol.* **193**:3461-3472.
7. **Khan SR, Gaines J, Roop RM, Farrand SK.** 2008. Broad-host-range expression vectors with tightly regulated promoters and their use to examine the influence of TraR and TraM expression on Ti plasmid quorum sensing. *Appl. Environ. Microbiol.* **74**:5053-5062.
8. **Akakura R, Winans SC.** 2002. Constitutive mutations of the OccR regulatory protein affect DNA bending in response to metabolites released from plant tumors. *J Biol Chem* **277**:5866-5874.

### Supplemental Figure Legends

#### Supplemental Figure 1. Time courses for static biofilm formation of *A.*

*tumefaciens*. (A) Wild type C58 and Class I Ctp mutants (B) Wild type C58 and Class II mutants. Quantification of acetic acid solubilized crystal violet for coverslip biofilms at 12, 24, 36, 48, 60, and 72 h post-inoculation. Adherent biomass was normalized by growth ( $A_{600}/OD_{600}$ ), and error bars are standard deviations for assays performed in triplicate.



**Supplemental Figure 2. Ectopic expression of *pilA* and *ctpA* rescues the  $\Delta$ *ctpA* (A) but not the  $\Delta$ *ctpB* (B) biofilm deficiency.** Quantification of acetic acid solubilized crystal violet for 72 h coverslip biofilms from *A. tumefaciens* derivatives, some of which harbor *P<sub>lac</sub>-ctpA* and *P<sub>lac</sub>-pilA* expression plasmids grown in the presence of 500  $\mu$ M IPTG. Adherent biomass was normalized by growth ( $A_{600}/OD_{600}$ ), and error bars are standard deviation for assays performed in triplicate.

**Supplemental Figure 3. Biofilm accumulation of wild type and Class I Ctp mutants.** Linear regressions of time-courses for coverslip biofilm formation data for *A. tumefaciens* C58 wild type and Class I mutants: The least square linear regressions of adherent biomass ( $A_{600}$ ) versus days was performed and the fitted lines show good fits for C58 and Class I mutants. Slopes reflect the estimated increased rate of biofilm accumulation.

**Supplemental Figure 4. Surface attachment to plant roots (A) and tumor formation on potato disks (B).** (A) Qualitative attachment assays were performed using cuttings of *Arabidopsis thaliana* roots with the wild type C58 and the  $\Delta$ *ctpA* mutant expressing GFP, incubated two days. Roots were viewed using a Nikon E800 at a 100X magnification. Green fluorescent foci are *A. tumefaciens* cells, plant root was non-fluorescent. (B) Tumor formations of the wild type C58, the  $\Delta$ *ctpA* mutant, and the  $\Delta$ *ctpCD* mutant were examined on organic red potato disks for 4 weeks incubation at

room temperature. Each strain was tested in three independent experiments containing five technical replicates per experiment per inoculum.

**Supplemental Figure 5. Analysis of *A. tumefaciens* C58 cured of its megaplasmids.** Quantification of acetic acid solubilized crystal violet for 72 h coverslip biofilms from *A. tumefaciens* derivatives. Adherent biomass was normalized by growth ( $A_{600}/OD_{600}$ ), and error bars are standard deviation for assays performed in triplicate.

**Supplemental Figure 6. Comparison of reversible and stable binding for *A. tumefaciens*.** Attachment to coverslips by *A. tumefaciens* derivatives after 1 hour incubation at an inoculum of  $OD_{600} = 0.8$ , was evaluated using a Nikon E800 in bright field mode at a 100X magnification. (A) Coverslips viewed after minimal rinsing; (B): Coverslips viewed after vigorous rinsing.

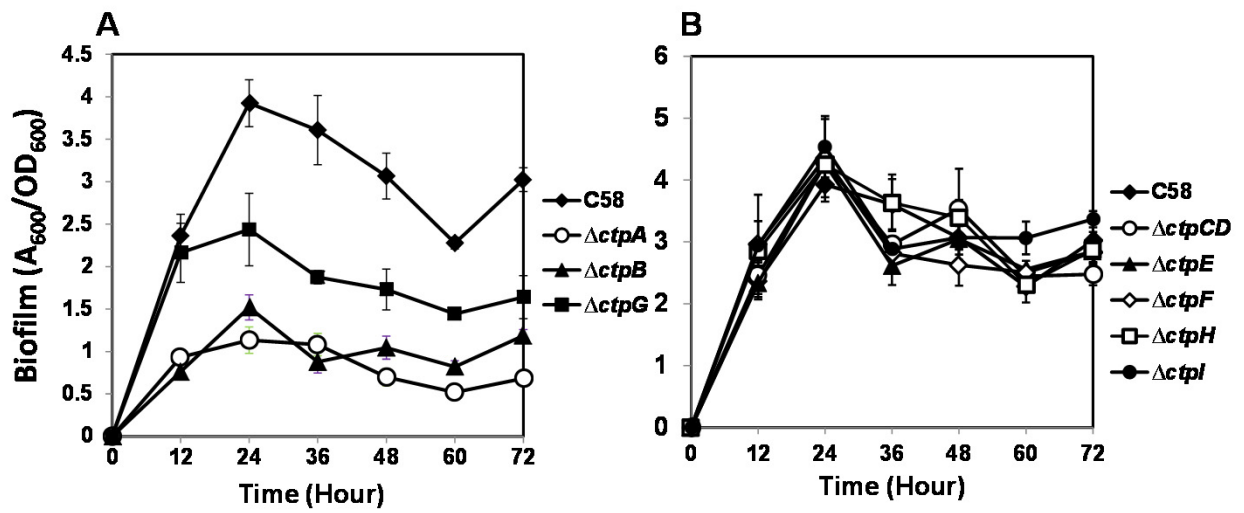

Supplementary Figure 1 – Wang et al.

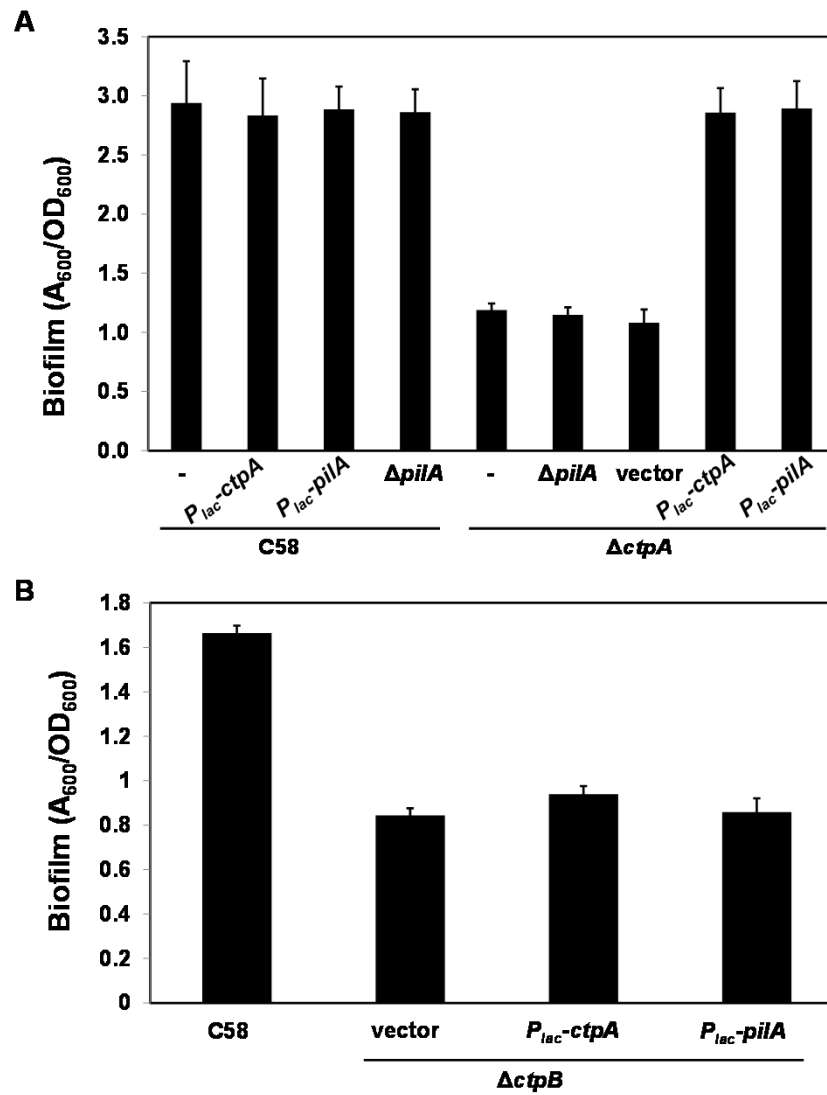

Supplemental Figure 2– Wang et al.

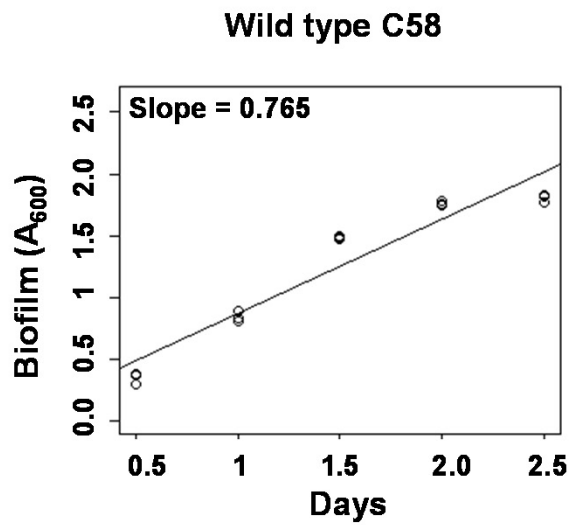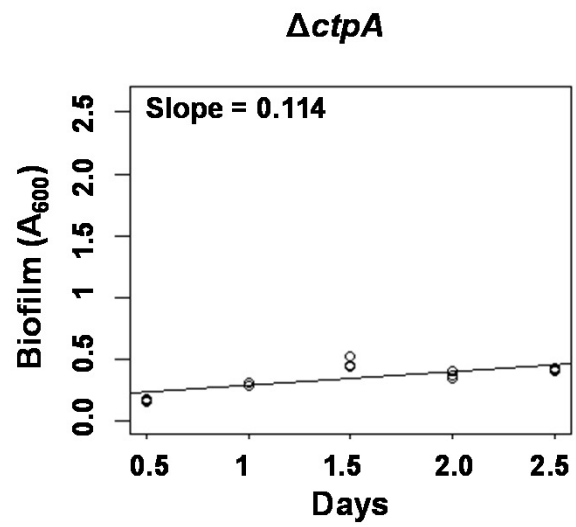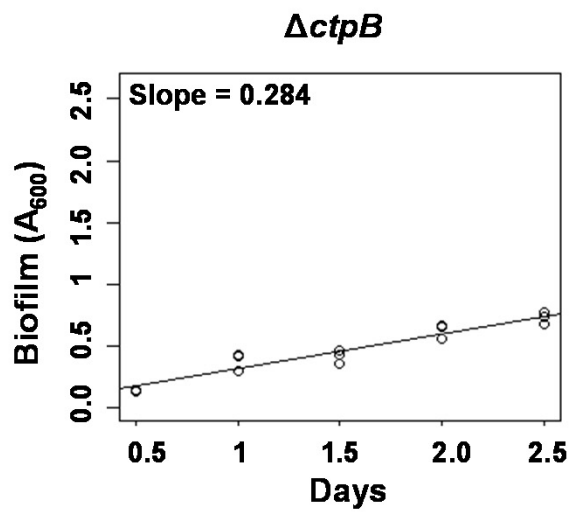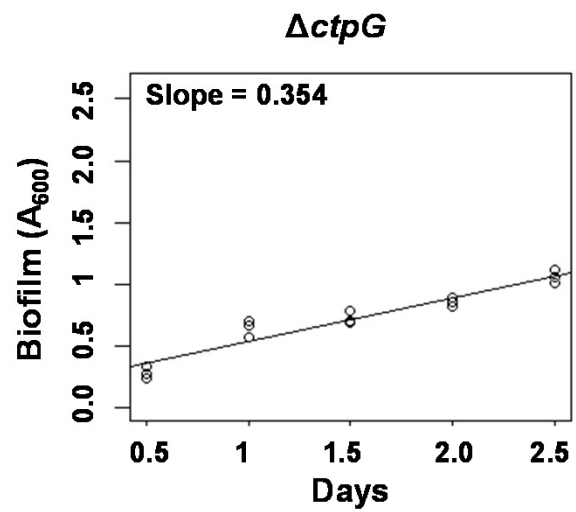

Supplemental Figure 3– Wang et al.

**A**

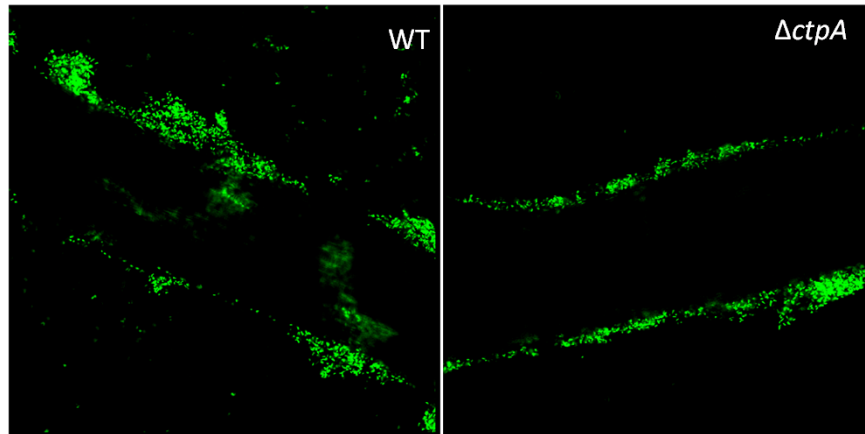

**B**

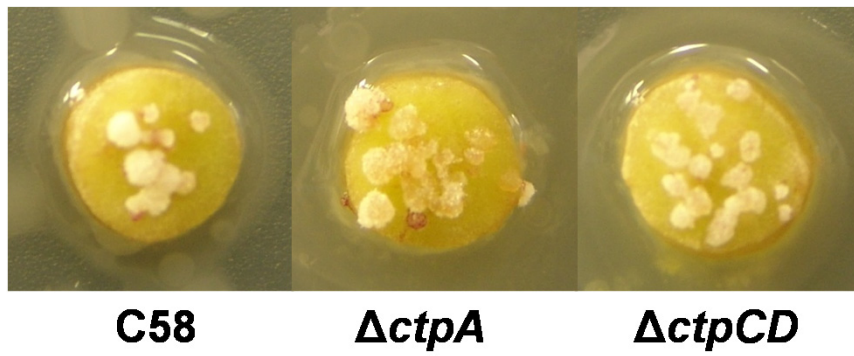

Supplemental Figure 4– Wang et al.

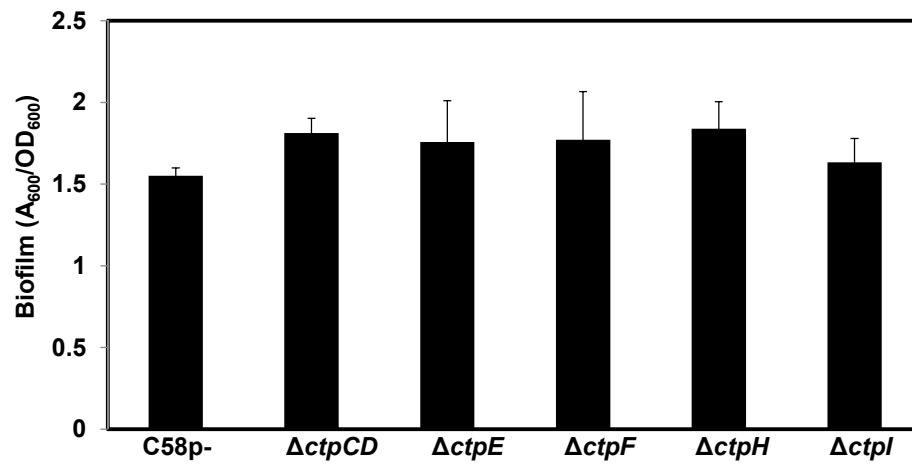

Supplementary Figure 5 – Wang et al.

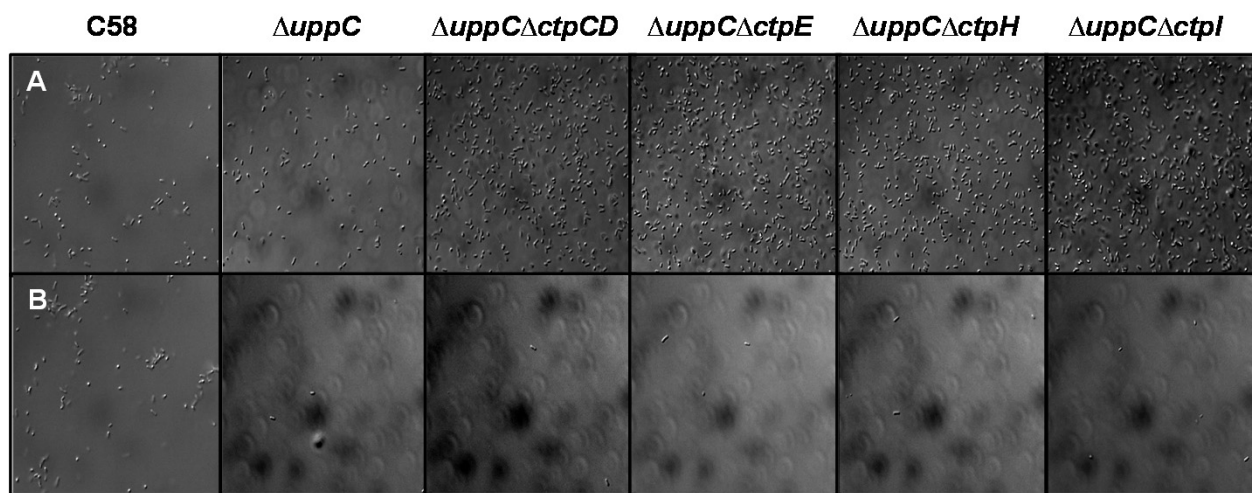

Supplementary Figure 6 – Wang et al.
